# Supplementary material for: HIV-1 virologic failure and acquired drug resistance among first-line antiretroviral experienced adults at a rural HIV clinic in coastal Kenya: a cross-sectional study
Source: PubMed Central journal article supplement (PMC3922732; doi:10.1186/1742-6405-11-9), 2014-01-23
Supplement: 1742-6405-11-9-S1.pdf [file 1742-6405-11-9-S1.pdf]

Supplementary table 1: Logistic regression analysis describing correlates of HIV-1 virologic failure (viral load  $\geq 1000$  copies/ml) among first line antiretroviral experienced adults at a rural HIV clinic in coastal Kenya (N=232).

| Characteristic                                 | Categories                      | Viraemia, n=48 [%] | Logistic univariable analysis |           |          | Logistic multivariable analysis (n=201) |           |          |
|------------------------------------------------|---------------------------------|--------------------|-------------------------------|-----------|----------|-----------------------------------------|-----------|----------|
|                                                |                                 |                    | Crude OR                      | 95% C.I   | *P-value | Adjusted OR                             | 95% C. I  | *P-value |
| <b>Gender</b>                                  | Male                            | 11/54 [20.4]       | 1.0                           |           |          |                                         |           |          |
|                                                | Female                          | 37/178 [20.8]      | 1.0                           | 0.5 – 2.2 | 0.947    | -                                       | -         | -        |
| <b>Age group (years)</b>                       | 15.0 – 34.9                     | 28/80 [35.0]       | 1.0                           |           |          | 1.0                                     |           |          |
|                                                | $\geq 35.0$                     | 20/152 [13.2]      | 0.3                           | 0.1 – 0.5 | <0.001   | 0.2                                     | 0.1 – 0.5 | <0.001   |
| <b>Marital status</b>                          | Single                          | 7/19 [36.8]        | 1.0                           |           |          |                                         |           |          |
|                                                | Married (monogamous/polygamous) | 31/132 [23.5]      | 0.5                           | 0.2 – 1.5 |          |                                         |           |          |
|                                                | Separated/Divorced/Widowed      | 10/81 [12.4]       | 0.2                           | 0.1 – 0.8 | 0.029    | -                                       | -         | -        |
| <b>Religion</b>                                | Christian                       | 32/152 [21.1]      | 1.0                           |           |          |                                         |           |          |
|                                                | Muslim                          | 6/41 [14.6]        | 0.6                           | 0.2 – 1.7 |          |                                         |           |          |
|                                                | Others                          | 10/39 [25.6]       | 1.3                           | 0.6 – 2.9 | 0.459    | -                                       | -         | -        |
| <b>Education status</b>                        | Primary schooling/Less          | 37/187 [19.8]      | 1.0                           |           |          |                                         |           |          |
|                                                | Secondary/Higher                | 11/45 [24.4]       | 1.3                           | 0.6 – 2.8 | 0.495    | -                                       | -         | -        |
| <b>Group distance (km)</b>                     | <10.0                           | 34/148 [23.0]      | 1.0                           |           |          |                                         |           |          |
|                                                | $\geq 10.0$                     | 14/84 [16.7]       | 0.7                           | 0.3 – 1.3 | 0.249    | -                                       | -         | -        |
| <b>Starting 1<sup>st</sup> line regimen</b>    | Zidovudine based                | 29/118 [24.6]      | 1.0                           |           |          |                                         |           |          |
|                                                | Stavudine based                 | 19/114 [16.7]      | 0.6                           | 0.3 – 1.2 | 0.136    | -                                       | -         | -        |
| <b>Baseline WHO staging</b>                    | I/II                            | 24/131 [18.3]      | 1.0                           |           |          |                                         |           |          |
|                                                | III/IV                          | 24/100 [24.0]      | 1.4                           | 0.7 – 2.7 | 0.293    | -                                       | -         | -        |
|                                                |                                 |                    |                               |           |          |                                         |           |          |
| <b>Baseline BMI groups (Kg/m<sup>2</sup>)</b>  | < 18.5                          | 22/95 [23.2]       | 1.0                           |           |          |                                         |           |          |
|                                                | $\geq 18.5$                     | 26/136 [19.1]      | 0.8                           | 0.4 – 1.5 | 0.458    | -                                       | -         | -        |
| <b>Baseline CD4 groups (cells/uL)</b>          | < 100                           | 22/96 [22.9]       | 1.0                           |           |          |                                         |           |          |
|                                                | $\geq 100$                      | 26/134 [19.4]      | 0.8                           | 0.4 – 1.5 | 0.519    | -                                       | -         | -        |
| <b>Duration on ART (months)</b>                | <12.0                           | 21/81 [25.9]       | 1.0                           |           |          |                                         |           |          |
|                                                | $\geq 12.0$                     | 27/151 [17.9]      | 0.6                           | 0.3 – 1.2 | 0.154    | -                                       | -         | -        |
| <b>Drug substitution</b>                       | No                              | 33/168 [19.6]      | 1.0                           |           |          |                                         |           |          |
|                                                | Yes                             | 15/64 [23.4]       | 1.3                           | 0.6 – 2.5 | 0.524    | -                                       | -         | -        |
| <b>Follow up WHO staging</b>                   | Stage I/II                      | 22/132 [16.7]      | 1.0                           |           |          |                                         |           |          |
|                                                | Stage III/IV                    | 26/100 [26.0]      | 1.7                           | 0.9 – 3.3 | 0.084    | -                                       | -         | -        |
| <b>Follow up BMI groups (Kg/m<sup>2</sup>)</b> | < 18.5                          | 10/36 [27.8]       | 1.0                           |           |          |                                         |           |          |
|                                                | $\geq 18.5$                     | 38/196 [19.4]      | 0.6                           | 0.3 – 1.4 | 0.267    | -                                       | -         | -        |
| <b>Follow up CD4 groups (cells/uL)</b>         | < 350                           | 31/131 [23.7]      | 1.0                           |           |          |                                         |           |          |
|                                                | $\geq 350$                      | 8/70 [11.4]        | 0.4                           | 0.2 – 1.0 | 0.031    | -                                       | -         | -        |
| <b>MPR adherence</b>                           | $\geq 95\%$ (Satisfactory)      | 28/181 [15.5]      | 1.0                           |           |          | 1.0                                     |           |          |
|                                                | <95% (Unsatisfactory)           | 15/43 [34.9]       | 2.9                           | 1.4 – 6.2 | 0.006    | 2.5                                     | 1.0 – 6.2 | 0.050    |

Baseline refers to indicators at ART initiation; Follow up refers to indicators at the time of sampling; \*Likelihood Ratio Test p-value; BMI (Body Mass Index); WHO (World Health Organization); MPR (Medicine Possession Ratio). Missing data; Baseline WHO staging (n=1 [0.4%]), Baseline BMI (n= 1 [0.4%]), Baseline CD4 count (n=2 [0.9%]), CD4 count (n=31 [13.4%]) and MPR adherence (n=8 [3.5%]).

**Supplementary table 2: Distribution and correlates of HIV-1 acquired drug resistance (if genotyping was only done for samples with viral load  $\geq 1000$  copies/ml) among first-line antiretroviral experienced adults at a rural HIV clinic in coastal Kenya (N=230).**

| Characteristic                             | Categories                      | Acquired drug resistance [row %] |            | *P-value |
|--------------------------------------------|---------------------------------|----------------------------------|------------|----------|
|                                            |                                 | No (n=202)                       | Yes (n=28) |          |
| Gender                                     | Male                            | 51 [94.4]                        | 3 [5.6]    | 0.100    |
|                                            | Female                          | 151 [85.8]                       | 25 [14.2]  |          |
| Age group (years)                          | 15.0 – 34.9                     | 61 [76.3]                        | 19 [23.7]  | <0.001   |
|                                            | $\geq 35.0$                     | 141 [94.0]                       | 9 [6.0]    |          |
| Marital status                             | Single                          | 13 [68.4]                        | 6 [31.6]   | 0.013    |
|                                            | Married (monogamous/polygamous) | 114 [87.0]                       | 17 [13.0]  |          |
|                                            | Separated/Divorced/Widowed      | 75 [93.8]                        | 5 [6.3]    |          |
| Religion                                   | Christian                       | 132 [87.4]                       | 19 [12.6]  | 1.000    |
|                                            | Muslim                          | 36 [87.8]                        | 5 [12.2]   |          |
|                                            | Others                          | 34 [89.5]                        | 4 [10.5]   |          |
| Education status                           | Primary schooling/Less          | 163 [88.1]                       | 22 [11.9]  | 0.801    |
|                                            | Secondary/Higher                | 39 [86.7]                        | 6 [13.3]   |          |
| Group distance (km)                        | <10.0                           | 129 [87.2]                       | 19 [12.8]  | 0.834    |
|                                            | $\geq 10.0$                     | 73 [89.0]                        | 9 [11.0]   |          |
| Starting 1 <sup>st</sup> line regimen      | Zidovudine based                | 102 [86.4]                       | 16 [13.6]  | 0.550    |
|                                            | Stavudine based                 | 100 [89.3]                       | 12 [10.7]  |          |
| Baseline WHO staging                       | I/II                            | 117 [90.0]                       | 13 [10.0]  | 0.309    |
|                                            | III/IV                          | 84 [84.9]                        | 15 [15.2]  |          |
| Baseline BMI groups (Kg/m <sup>2</sup> )   | < 18.5                          | 83 [89.3]                        | 10 [10.8]  | 0.683    |
|                                            | $\geq 18.5$                     | 118 [86.8]                       | 18 [13.2]  |          |
| Baseline CD4 groups (cells/uL)             | <100                            | 82 [86.3]                        | 13 [13.7]  | 0.683    |
|                                            | > 100                           | 118 [88.7]                       | 15 [11.3]  |          |
| Duration on ART (months)                   | < 12.0                          | 70 [86.4]                        | 11 [13.6]  | 0.675    |
|                                            | $\geq 12.0$                     | 132 [88.6]                       | 17 [11.4]  |          |
| Drug substitution                          | No                              | 145 [87.4]                       | 21 [12.6]  | 0.825    |
|                                            | Yes                             | 57 [89.1]                        | 7 [10.9]   |          |
| Follow up WHO staging                      | Stage I/II                      | 119 [91.5]                       | 11 [8.5]   | 0.066    |
|                                            | Stage III/IV                    | 83 [83.0]                        | 17 [17.0]  |          |
| Follow up BMI groups (Kg/m <sup>2</sup> )  | < 18.5                          | 30 [83.3]                        | 6 [16.7]   | 0.404    |
|                                            | $\geq 18.5$                     | 172 [88.7]                       | 22 [11.3]  |          |
| Follow up CD4 groups (cells/uL)            | < 350                           | 111 [85.4]                       | 19 [14.6]  | 0.267    |
|                                            | $\geq 350$                      | 64 [91.4]                        | 6 [8.6]    |          |
| MPR adherence                              | $\geq 95\%$ (Satisfactory)      | 162 [90.5]                       | 17 [9.5]   | 0.009    |
|                                            | < 95% (Unsatisfactory)          | 32 [74.4]                        | 11 [25.6]  |          |
| Viral load (log <sub>10</sub> , copies/ml) | 0.00 – 4.00                     | 190 [96.0]                       | 8 [4.0]    | <0.001   |
|                                            | > 4.00                          | 12 [37.5]                        | 20 [62.5]  |          |

*Baseline* refers to indicators at ART initiation; *Follow up* refers to indicators at the time of sampling; \*Fisher's exact p-value; BMI (Body Mass Index); WHO (World Health Organization) MPR (Medicine Possession Ratio). Missing data; Baseline WHO staging (n=1 [0.4%]), Baseline BMI (n= 1 [0.4%]), Baseline CD4 count (n=2 [0.9%]), CD4 count (n=31 [13.4%]) and MPR adherence (n=8 [3.5%]).
